# Supplementary material for: Emotional disclosure as a therapeutic intervention in palliative care: a scoping review protocol
Source: PubMed Central journal article supplement (PMC6720334; doi:10.1136/bmjopen-2019-031046), 2019-08-26
Supplement: bmjopen-2019-031046supp002.pdf [file bmjopen-2019-031046supp002.pdf]

**Supplementary file 2. Search strategy for Ovid PsycINFO: 1806 to 2019**

- 1 exp Emotions/ (300490)
- 2 emotion\* (382265)
- 3 feeling\* (103050)
- 4 1 OR 2 OR 3 (598583)

\*\*\*\*\*

- 5 Palliative Care/ (11016)
- 6 (palliat\* or terminal\* or endstage or hospice\* or metasta\* or (end adj3 life) or (care adj3 dying) or ((advanced or late or last or end or final) adj3 (stage\* or phase\*))).tw. (54673)
- 7 5 OR 6 (54847)

\*\*\*\*\*

- 8 (disclos\* or express\* or communicat\* or talk\* or speak\* or spoke\* or writ\* or draw\* or sing\*).mp. (1005983)

\*\*\*\*\*

- 9 4 AND 7 AND 8 (2575)

\*\*\*\*\*

- 10 Apply filter: Humans (2278)
- 11 Apply filter: Adulthood (18+ years) (1320)
