# Supplementary material for: Emotional disclosure as a therapeutic intervention in palliative care: a scoping review protocol
Source: PubMed Central journal article supplement (PMC6720334; doi:10.1136/bmjopen-2019-031046), 2019-08-26
Supplement: bmjopen-2019-031046supp003.pdf [file bmjopen-2019-031046supp003.pdf]

**Supplementary file 3. Data charting extraction categories****Citation (Authors, year, title, journal, volume, page):****Keywords:****1. Population**

- a. Country:
- b. Size (n):
  - a. Total
  - b. Intervention
  - c. Control group(s)
- c. Disease and stage
- d. Age
- e. Sex
- f. Ethnicity
- g. Other of note
- h. Patient healthcare setting (hospice, hospital etc.)

**2. Study details**

- i. Study design
- j. Study objective

**3. Intervention details**

- k. Intervention name
- l. Objective of intervention
- m. Task description
- n. Control task description
- o. Number of task sessions total
- p. Task schedule (days between tasks)
- q. Intervention setting (where task is completed)

**4. Outcome measures**

- r. Primary
- s. Secondary
- t. Other measures (covariates, moderators)
- u. Assessment time-points

**5. Results**

- v. Primary outcome results
- w. Secondary outcome results
- x. Other results

**6. Setting specific intervention details**

- y. Explicit adaptations to the intervention
- z. Facilitators and barriers to intervention feasibility

**7. Theoretical frameworks described**
